# Supplementary material
Source: publisher figshare collection journal article supplement (https://sage.figshare.com/ndownloader/files/17811080)
Supplement: Supplementary file 1 [file 17811080]

## Appendix 1.

*Questionnaire:* The following questions were asked during the phone interview.

1. What is the current age of your child? \_\_\_\_\_
2. What age was he/she diagnosed with celiac disease? \_\_\_\_\_
3. At what age did the onset of symptoms for celiac disease begin? \_\_\_\_\_
4. What were the most prominent symptoms? \_\_\_\_\_

Diarrhea              Vomiting              Irritable Bowel              Abdominal Pain              Stomach  
Aches      Failure to thrive              weight loss      Short stature              Chronic fatigue              Joint  
pain      Other \_\_\_\_\_

5. Is your child on a gluten free diet now? Y/N
6. How long has he/she been on the diet? \_\_\_\_\_
7. How strictly has your child adhered to or followed the diet? Loosely/moderately/strictly  
Please describe \_\_\_\_\_
8. Family History
  - a. Has anyone else in the (immediate) family been diagnosed with celiac disease?  
Y/N
  - b. Does the father, mother, or any siblings have headaches? Y/N
    - i. Who? \_\_\_\_\_
    - ii. Please Describe (use questions 11a-c when  
headache \_\_\_\_\_
    - iii. Does the relative still have headaches now or did they only take place  
during childhood? (Childhood only / Both childhood and present)
9. Past Medical History
  - a. Has your child been diagnosed with a learning disorder (LD)? Y/N attention  
deficit disorder (ADD)? Y/N
  - b. Has your child had problems with balance (ataxia)? Y/N
    - i. Felt tingling (neuropathy)? Y/N?
    - ii. Or weakness? Y/N

- c. Does your child have seizures currently? Y/N
  - i. In the past? Y/N
  - ii. With fever? Y/N
- d. Has your child been diagnosed with cerebral palsy or developmental disorder? Y/N
- e. Has your child been diagnosed with autism or any other severe behavioral problem? Y/N  
Specify (if known) \_\_\_\_\_

#### 10. Academics

- a. How are your child's grades in the past year? A-B/ B-C/ C-D / D-below
- b. In the past year, how many days has your child missed school?
  - i. 0-5/5-10/10-15/ >15
- c. What were the causes of the missed school? \_\_\_\_\_

#### 11. Headache

- a. Please describe your headaches
  - i. Daily/episodic
  - ii. Loss of appetite? Y/N
  - iii. Nausea/vomiting?
  - iv. Does your child want the lights off? Y/N
  - v. Does the child tolerate loud noises when this headache occurs? Y/N
  - vi. Does your child have a pale complexion when getting this headache? Y/N
  - vii. Does your child like to lie down during a headache? Y/N
  - viii. Are there any other symptoms? \_\_\_\_\_
- b. Date of Onset? \_\_\_\_\_
- c. Frequency? \_\_\_\_\_
- d. Is your child on preventative medicine for those headaches? Y/N
  - i. If yes, what is the name of the medication? \_\_\_\_\_
- e. Is your child taking over the counter medicine for those headaches? Y/N
  - i. If Y, is he/she taking it 2 times or less per week or 3 times or more?
- f. Has your child had an MRI or CT scan of the head?
  - i. Results? \_\_\_\_\_ Abnormal/Normal
  - ii. If the results were abnormal, can you have the MRI or CT scan sent to us?
- g. Are the headaches still occurring? \_\_\_\_\_ Y/N

- 12. Have the headaches gotten better, worse, or the same after the gluten free diet? If so, were they better by frequency, intensity, or both?
